# Supplementary material for: Hysteretic hERG channel gating current recorded at physiological temperature
Source: PubMed Central journal article supplement (PMC8993916; doi:10.1038/s41598-022-10003-7), 2022-04-08
Supplement: 41598_2022_10003_MOESM1_ESM.pdf [file 41598_2022_10003_MOESM1_ESM.pdf]

Supplemental Material for:

Hysteretic hERG channel gating current recorded at physiological temperature  
David K. Jones<sup>1,2</sup>

<sup>1</sup>Department of Pharmacology  
University of Michigan School of Medicine  
Ann Arbor, MI 48109

<sup>2</sup>Department of Internal Medicine  
University of Michigan School of Medicine  
Ann Arbor, MI 48109

Correspondence: [davekj@umich.edu](mailto:davekj@umich.edu)

## Supplementary Figure S1

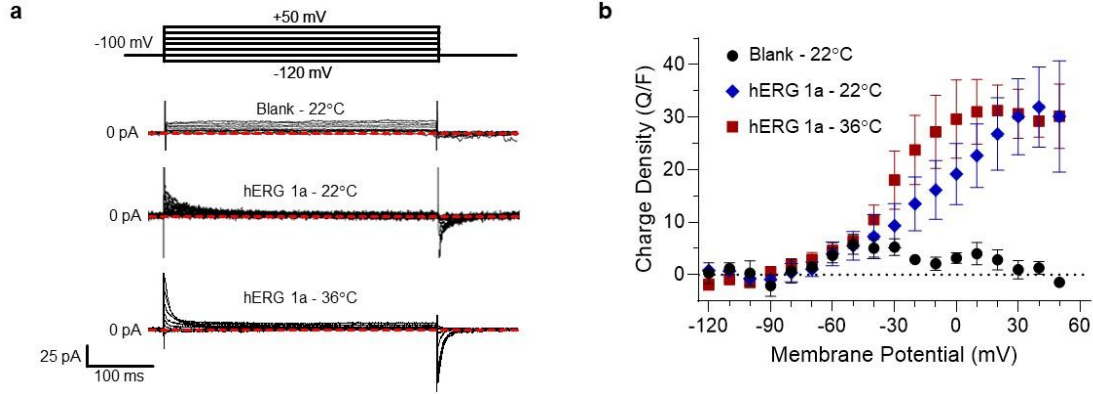

**Supplementary Figure S1.** Charge density recorded from blank HEK293 cells and HEK293 cells stably expressing hERG 1a. (a) Sample current traces recorded at 22 °C from blank HEK293 cells (*top*) or HEK293 cells expressing hERG 1a recorded at 22 °C (*middle*) and 36 °C (*bottom*). Membrane capacitance transients were compensated from a +20 mV depolarizing pulse from a -120 mV holding potential. Following compensation, currents elicited during the step pulse of the pulse protocol shown in “a” were integrated, normalized to membrane capacitance, and plotted as a function of test potential. (b) Quantification of recordings as shown in “a” for blank HEK293 cells (*black circles*) and HEK293 cells expressing hERG 1a recorded at 22 °C (*blue diamonds*) and 36 °C (*red squares*). Only HEK293 cells expressing hERG 1a displayed measurable gating charge. All data are reported as mean  $\pm$  SEM.  $n = 6 - 12$

## Supplementary Tables

| Supplemental Table S1. hERG 1a Gating Charge Activation & Deactivation |                 |                |                   |                                     |                                   |                    |                           |    |
|------------------------------------------------------------------------|-----------------|----------------|-------------------|-------------------------------------|-----------------------------------|--------------------|---------------------------|----|
|                                                                        | Activation      |                |                   | Deactivation                        |                                   |                    | $V_{MD} - V_{MA}$<br>(mV) | N  |
|                                                                        | $V_{1/2}$ (mV)  | $K$            | $V_{Median}$ (mV) | $V_{1/2}$ (mV)                      | $K$                               | $V_{Median}$ (mV)  |                           |    |
| Control, 22°C                                                          | $-16.6 \pm 2.7$ | $15.3 \pm 1.4$ | $-22.5 \pm 4.2$   | $-48.4 \pm 4.3$                     | $21.8 \pm 3.6$                    | $-42.2 \pm 5.5$    | $-10.0 \pm 5.0$           | 8  |
| Control, 36°C                                                          | $-27.7 \pm 3.8$ | $20.5 \pm 6.3$ | $-31.0 \pm 4.2$   | $-21.3 \pm 5.3,$<br>$-52.8 \pm 3.6$ | $26.9 \pm 4.2,$<br>$11.9 \pm 1.2$ | $-40.4 \pm 4.5$    | $-7.2 \pm 5.3$            | 12 |
| scFv2.10, 36°C                                                         | $-35.5 \pm 2.5$ | $16.6 \pm 3.0$ | $-36.6 \pm 1.2$   | $-66.7 \pm 3.1$                     | $7.5 \pm 1.0$                     | $-66.1 \pm 4.4^*$  | $-22.8 \pm 4.3^{*\#}$     | 14 |
| scFv2.12, 36°C                                                         | $-31.8 \pm 5.0$ | $17.0 \pm 2.3$ | $-31.8 \pm 5.0$   | $-68.2 \pm 2.8$                     | $9.1 \pm 1.8$                     | $-69.0 \pm 10.0^*$ | $-34.0 \pm 10.0^{*\#}$    | 6  |

\*indicates  $p < 0.05$  vs Control

#indicates  $p < 0.05$  vs “0”

| Supplemental Table S2. hERG 1a Ionic Current Activation & Deactivation |                |             |                |             |                             |    |
|------------------------------------------------------------------------|----------------|-------------|----------------|-------------|-----------------------------|----|
|                                                                        | Activation     |             | Deactivation   |             | $V_{1/2D}-V_{1/2A}$<br>(mV) | N  |
|                                                                        | $V_{1/2}$ (mV) | $K$         | $V_{1/2}$ (mV) | $K$         |                             |    |
| Control, 22°C                                                          | 3.4 ± 4.2*     | 10.3 ± 0.3* | -55.9 ± 2.8*   | 12.5 ± 1.2* | -60.2 ± 6.8**               | 5  |
| Control, 36°C                                                          | -23.3 ± 1.4    | 7.4 ± 0.4   | -46.8 ± 1.4    | 8.7 ± 0.7   | -23.6 ± 1.5#                | 12 |
| scFv2.10, 36°C                                                         | -21.3 ± 1.1    | 7.0 ± 0.2   | -33.8 ± 1.8*   | 8.7 ± 0.4   | -12.5 ± 1.8**               | 16 |
| scFv2.12, 36°C                                                         | -19.7 ± 1.5    | 7.5 ± 0.4   | -41.4 ± 1.8*   | 8.5 ± 0.4   | -22.3 ± 2.5#                | 12 |

\*indicates  $p < 0.05$  vs Control @ 36°C

| Supplemental Table S3. Inducible hERG 1b Cell Line Activation & Deactivation |                |           |                |            |                             |   |
|------------------------------------------------------------------------------|----------------|-----------|----------------|------------|-----------------------------|---|
|                                                                              | Activation     |           | Deactivation   |            | $V_{1/2D}-V_{1/2A}$<br>(mV) | N |
|                                                                              | $V_{1/2}$ (mV) | $K$       | $V_{1/2}$ (mV) | $K$        |                             |   |
| hERG 1a                                                                      | -38.7 ± 2.5    | 8.3 ± 0.5 | -60 ± 2.0      | 11.6 ± 1.4 | -20.3 ± 2.2#                | 9 |
| hERG 1a/1b                                                                   | -35.9 ± 1.5    | 8.2 ± 0.6 | -49.1 ± 3.4*   | 9.0 ± 0.5  | -13.1 ± 2.6**               | 8 |

\*indicates  $p < 0.05$  vs hERG 1a

#indicates  $p < 0.05$  vs "0"

| Supplemental Table S4. Inducible hERG 1b Cell Line Gating Charge Activation & Deactivation |                |            |                   |                             |                          |                   |                         |   |
|--------------------------------------------------------------------------------------------|----------------|------------|-------------------|-----------------------------|--------------------------|-------------------|-------------------------|---|
|                                                                                            | Activation     |            |                   | Deactivation                |                          |                   | $V_{MD}-V_{MA}$<br>(mV) | N |
|                                                                                            | $V_{1/2}$ (mV) | $K$        | $V_{Median}$ (mV) | $V_{1/2}$ (mV)              | $K$                      | $V_{Median}$ (mV) |                         |   |
| hERG 1a                                                                                    | -51.4 ± 6.0    | 22.6 ± 2.6 | -42.0 ± 3.6       | -35.2 ± 8.3,<br>-82.8 ± 1.7 | 21.1 ± 4.2,<br>6.9 ± 2.0 | -48.3 ± 6.5       | -8.2 ± 7.2              | 6 |
| hERG 1a/1b                                                                                 | -44.0 ± 6.0    | 17.9 ± 1.0 | -41.9 ± 7.7       | -72.2 ± 4.5                 | 15.3 ± 1.3               | -66.7 ± 5.3*      | -36.6 ± 2.6**           | 5 |

\*indicates  $p < 0.05$  vs hERG 1a

#indicates  $p < 0.05$  vs "0"
